# Supplementary material
Source: PubMed Central journal article supplement (PMC7572527)

# Source Data for Figure 1

Figure 1d

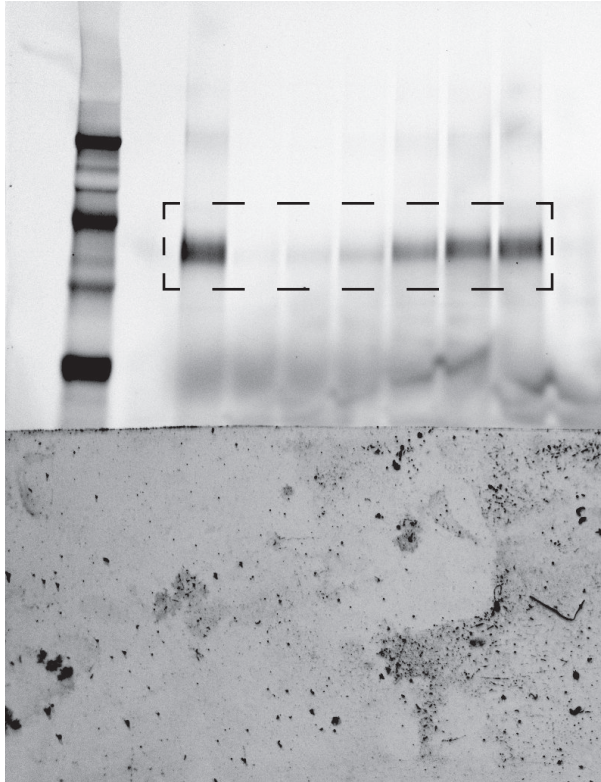

Figure 1d

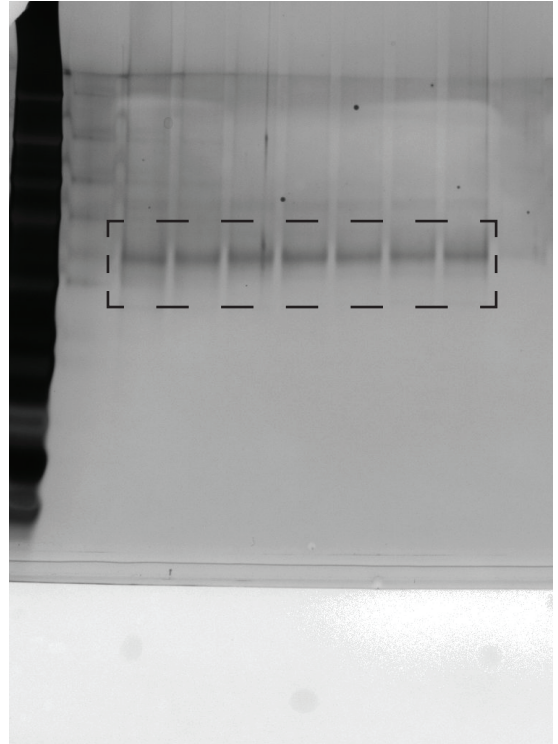

Supplement: NIHMS1589521-supplement-1589521_SourceDataFig1.pdf [file NIHMS1589521-supplement-1589521_SourceDataFig1.pdf]

# Source Data for Figure 2

## Figure 2a

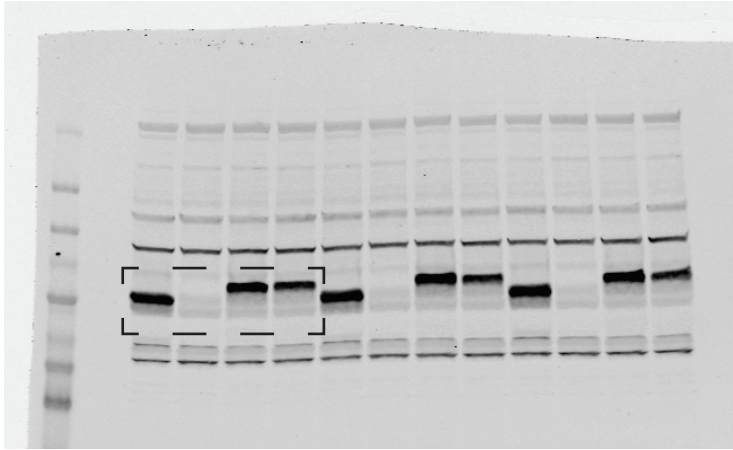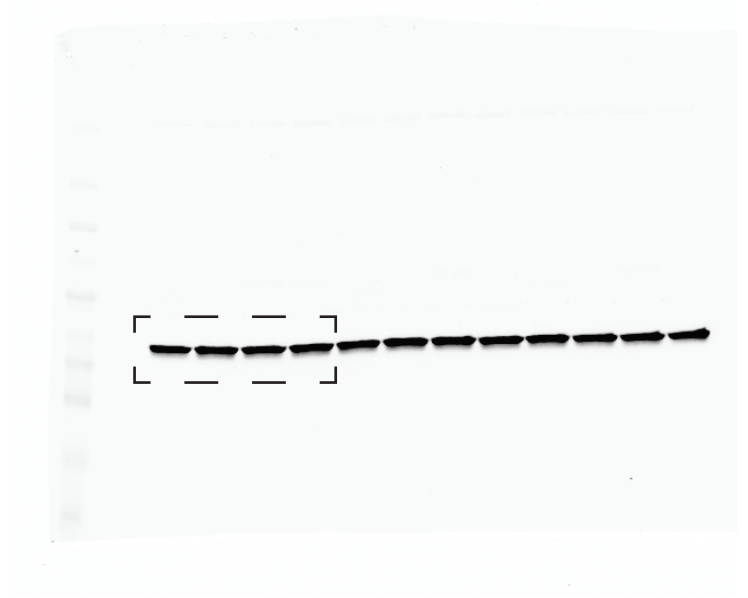

## Figure 2d

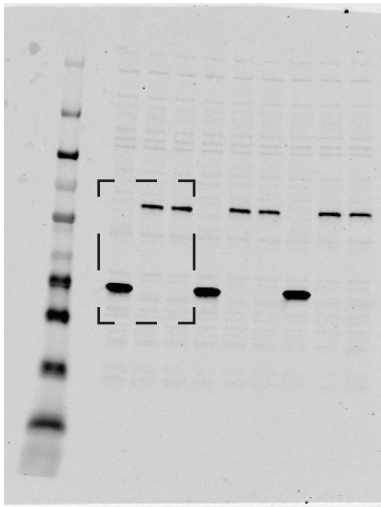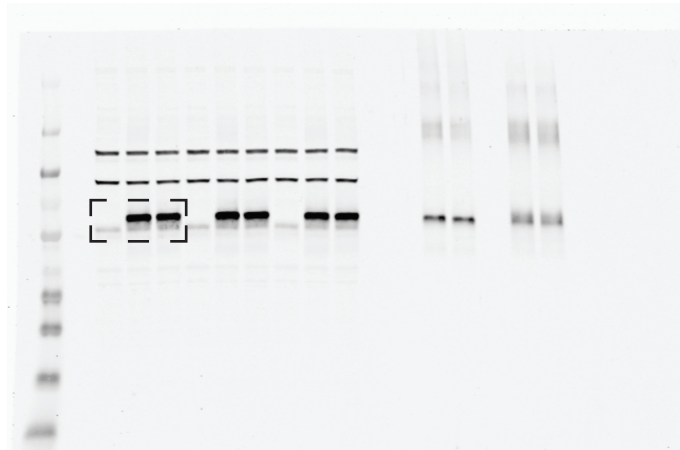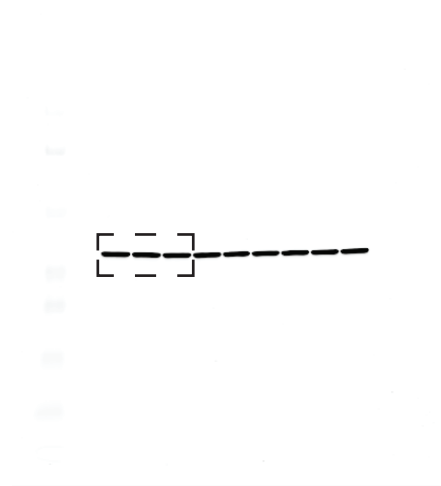

Supplement: NIHMS1589521-supplement-1589521_SourceDataFig2.pdf [file NIHMS1589521-supplement-1589521_SourceDataFig2.pdf]

# Source Data for Figure 4

Figure 4a

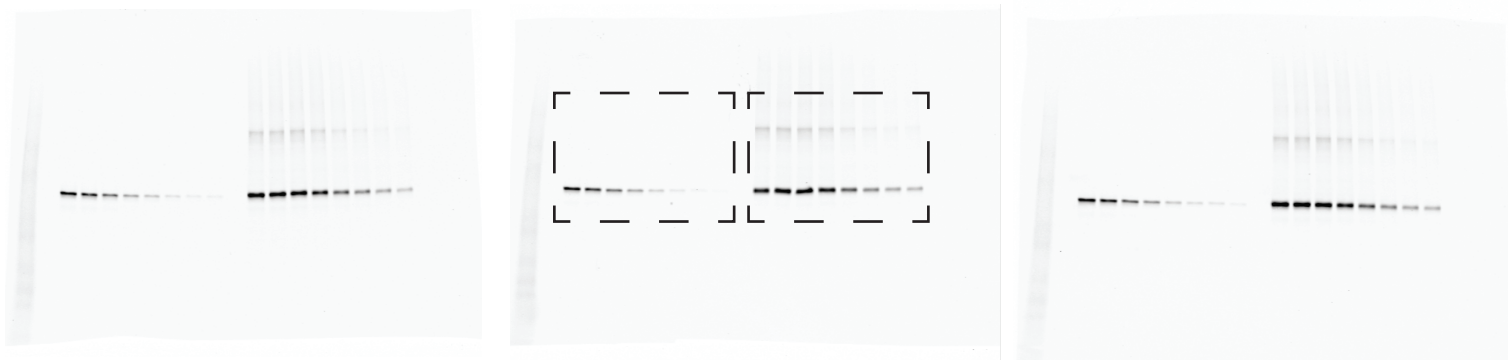

Figure 4f

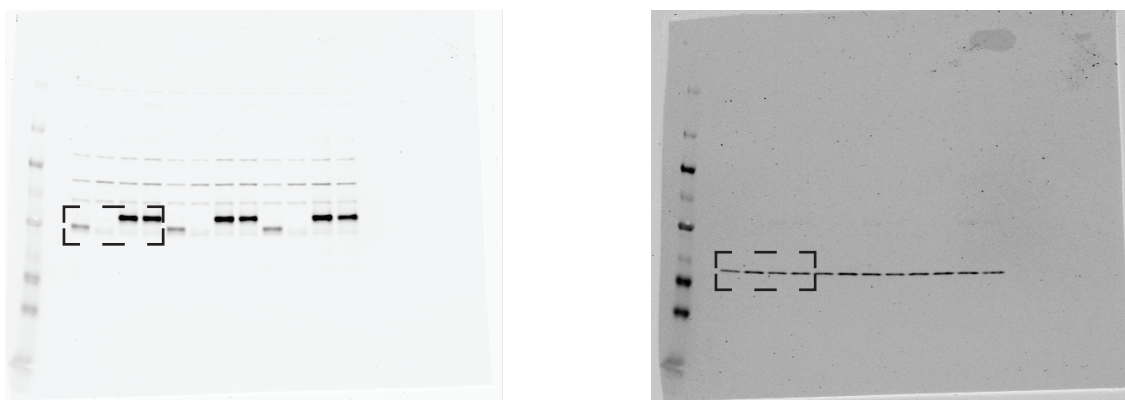

Supplement: NIHMS1589521-supplement-1589521_SourceDataFig4.pdf [file NIHMS1589521-supplement-1589521_SourceDataFig4.pdf]

# Source Data for Figure 6

Figure 6b

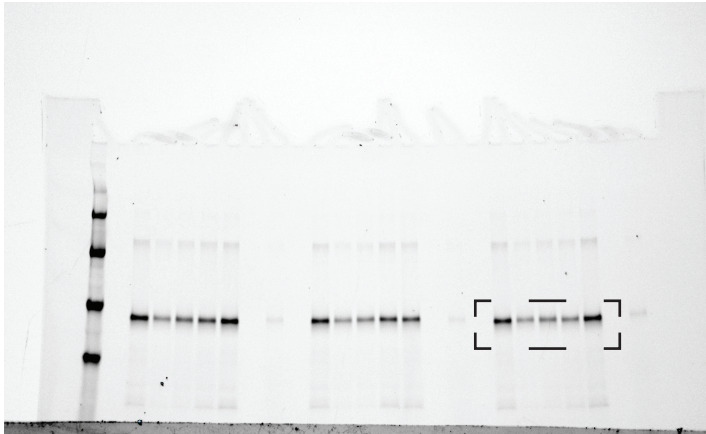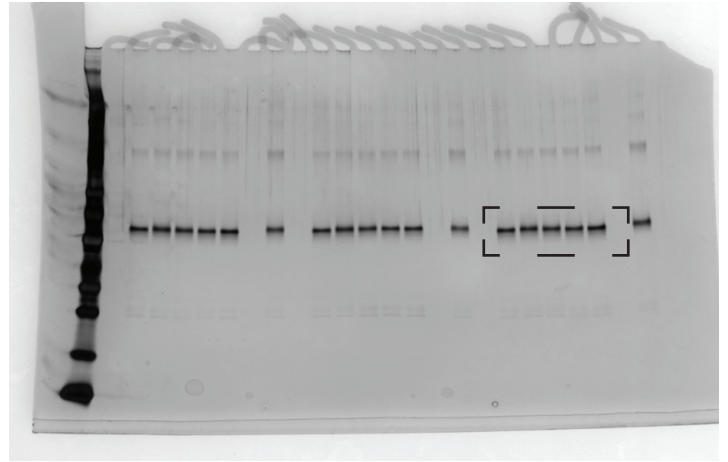

Figure 6c

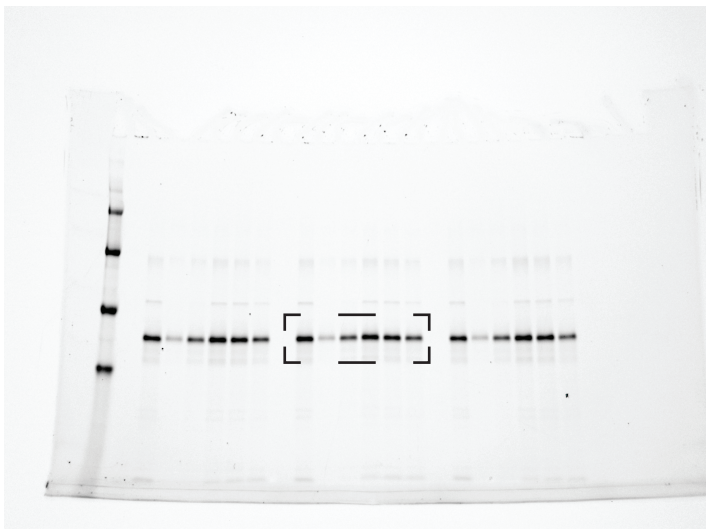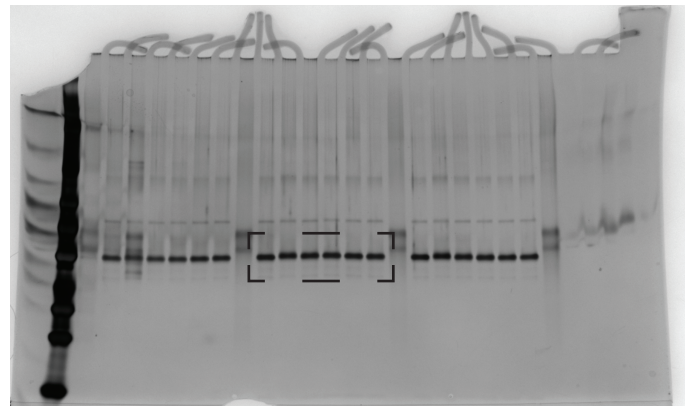

Figure 6d

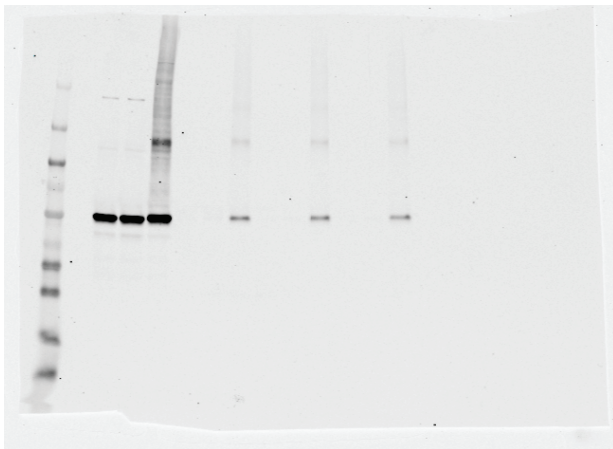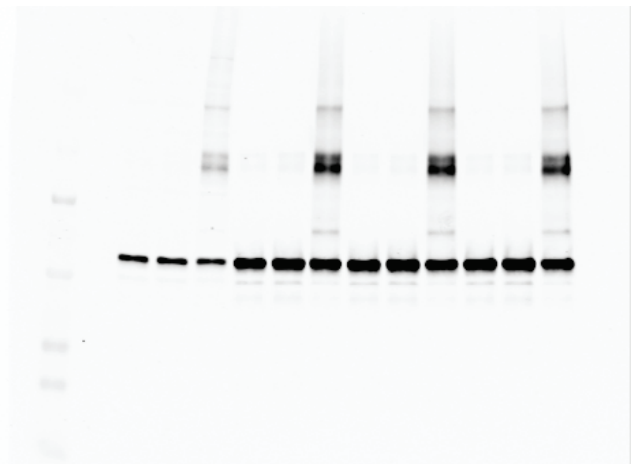

Supplement: NIHMS1589521-supplement-1589521_SourceDataFig6.pdf [file NIHMS1589521-supplement-1589521_SourceDataFig6.pdf]

# Source Data for Extended Data Figure 10

Extended Data Figure 10

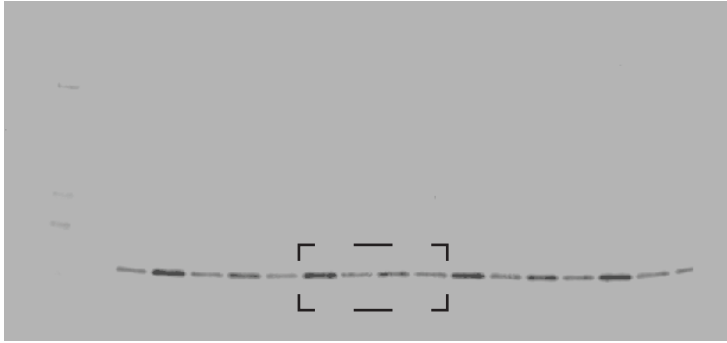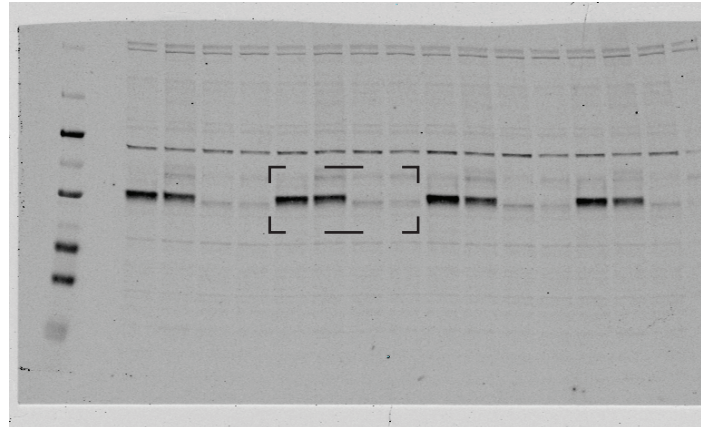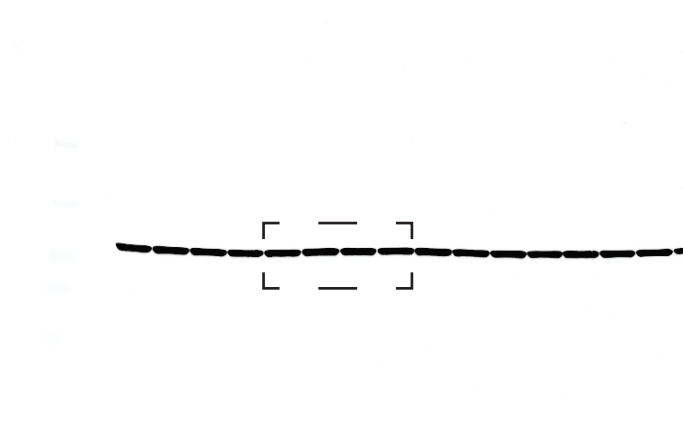

Supplement: NIHMS1589521-supplement-1589521_SourceExtDataFig10.pdf [file NIHMS1589521-supplement-1589521_SourceExtDataFig10.pdf]

# Source Data for Extended Data Figure 4

Extended Data Figure 4

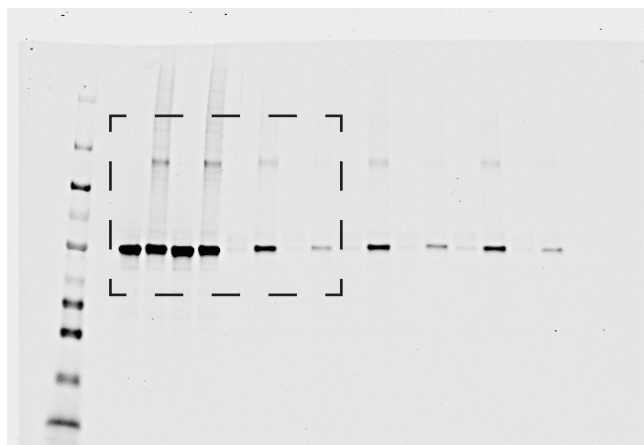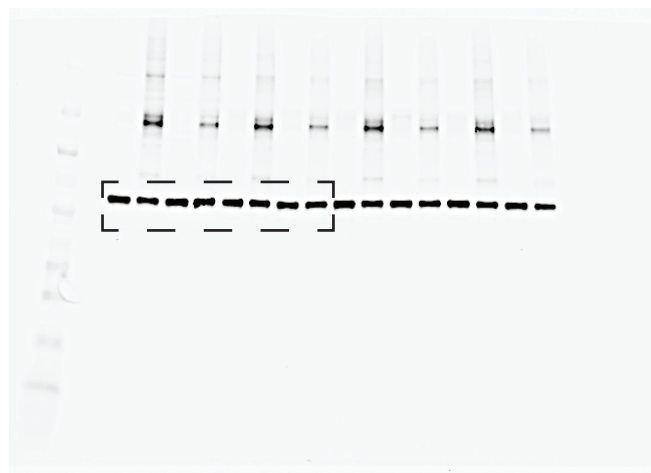

Supplement: NIHMS1589521-supplement-1589521_SourceExtDataFig4.pdf [file NIHMS1589521-supplement-1589521_SourceExtDataFig4.pdf]

# Source Data for Extended Data Figure 6

Extended Data Figure 6a

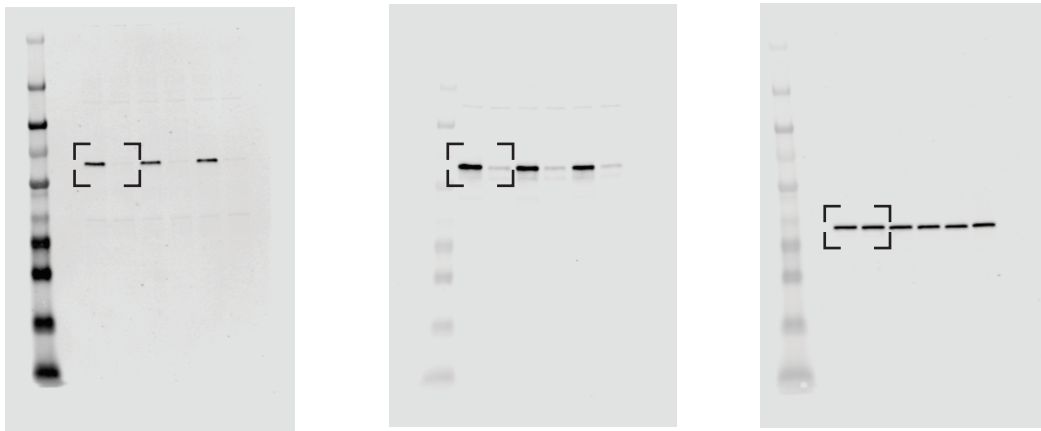

Extended Data Figure 6b

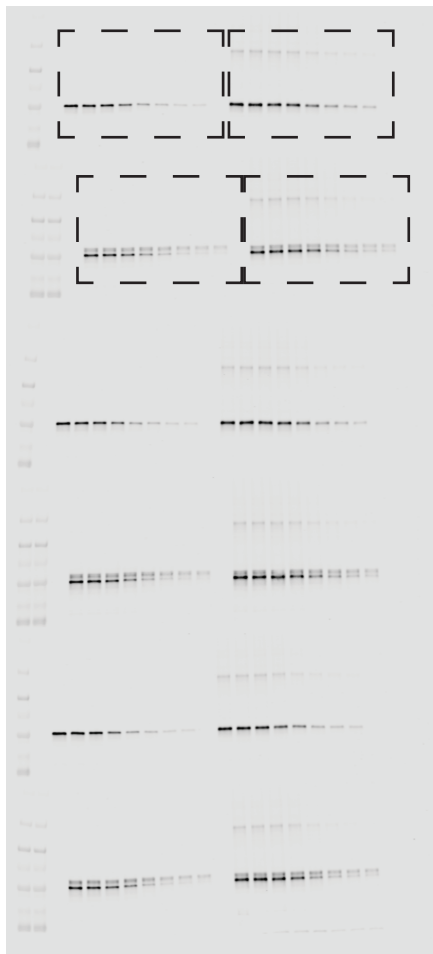

Supplement: NIHMS1589521-supplement-1589521_SourceExtDataFig6.pdf [file NIHMS1589521-supplement-1589521_SourceExtDataFig6.pdf]
